# Supplementary material for: Apatite as an Indicator of Pge Mineralization Formation as Exemplified by Anorthosites of the Kievey Deposit, Fedorova-Pana Layered Complex, Kola Peninsula
Source: Preprints.org preprint supplement (doi:10.20944/preprints202311.0074.v1), 2023-11-02
Supplement: Supplementary file 1 [file supplementary]

| 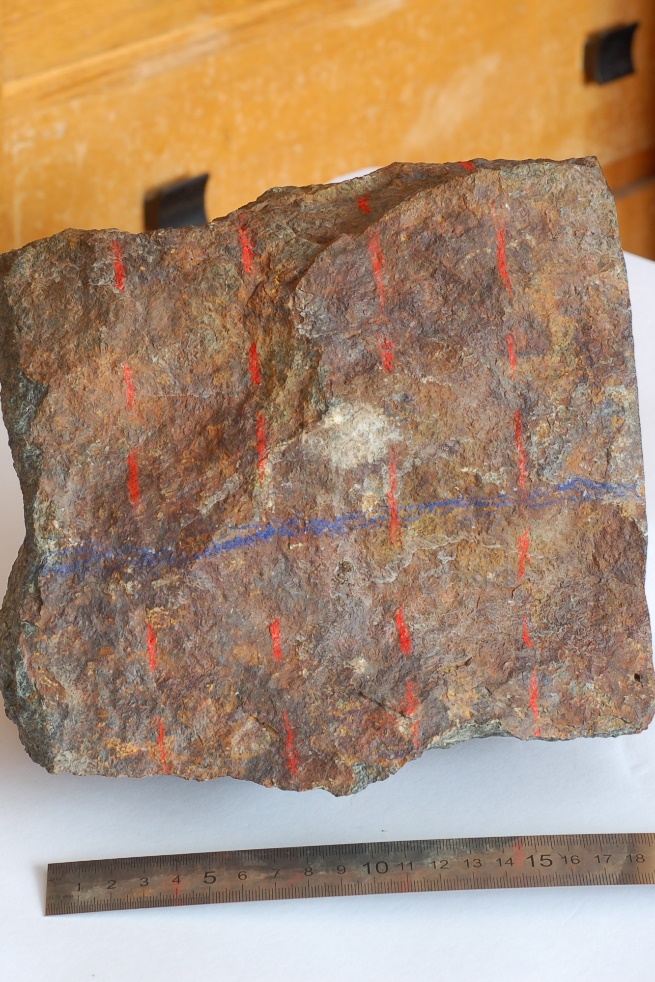 | 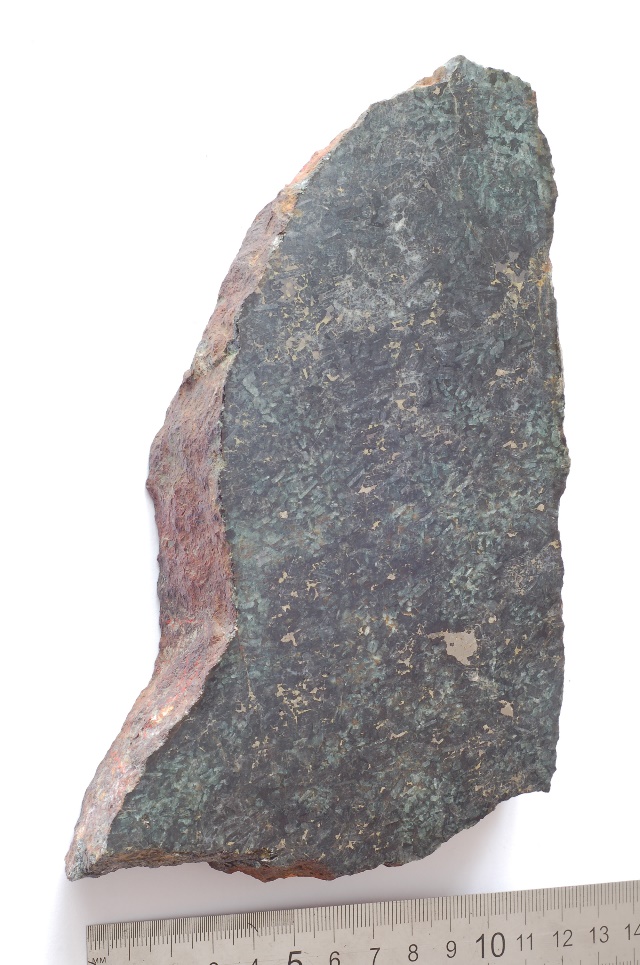 | 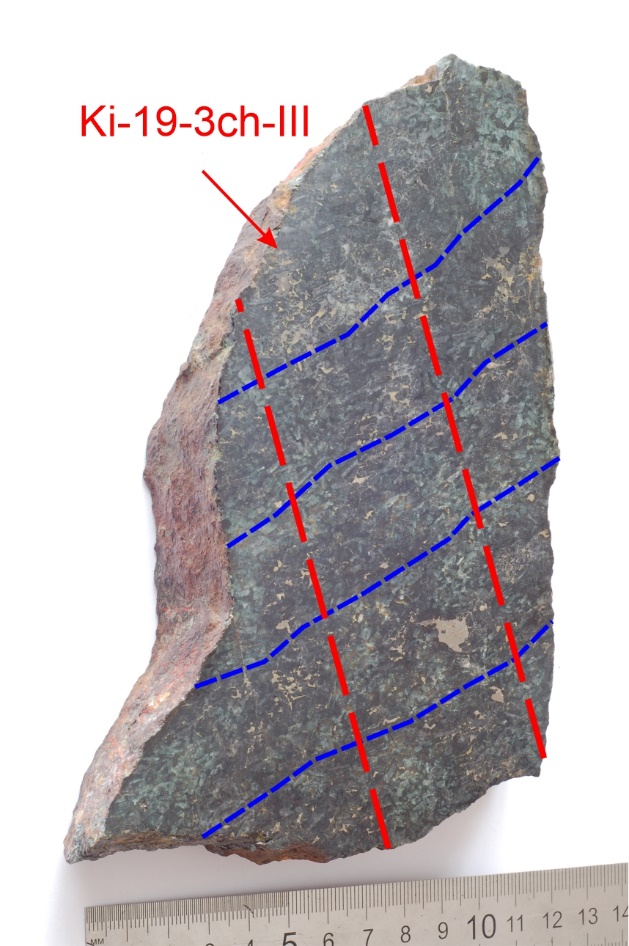 |
| --- | --- | --- |
| (**A**) | (**B**) | (**C**) |

**Figure S1.** Photographs of a mineralized anorthosite ore block from the Kievey deposit. (**A**) Sample Ki-19-3ch that was cut along red lines into five pieces at right angles to the plane-parallel orientation of the plagioclase. The latter is indicated by blue line. (**B**, **C**) Photograph of a polished slab of mineralized anorthosite that was cut to produce the 30×45×150 mm sample Ki-19-3ch-III. Dashed blue lines in image (**C**) also indicate the direction of the plagioclase plane-parallel orientation.
